# Supplementary material for: A New Synergetic Nanocomposite for Dye Degradation in Dark and Light
Source: PubMed Central journal article supplement (PMC5144144; doi:10.1038/srep38606), 2016-12-08
Supplement: srep38606-s1.pdf [file srep38606-s1.pdf]

# **A New Synergetic Nanocomposite for Dye Degradation in Dark and Light**

V. Lakshmi Prasanna & Rajagopalan Vijayaraghavan\*

Department of Chemistry, School of Advanced Sciences, VIT University, 632 014, Vellore,  
India

## **Author contact information:**

\*E-mail ID : [rvijayaraghavan@vit.ac.in](mailto:rvijayaraghavan@vit.ac.in)

[Ph : +91 416 220 2322](tel:+914162202322)

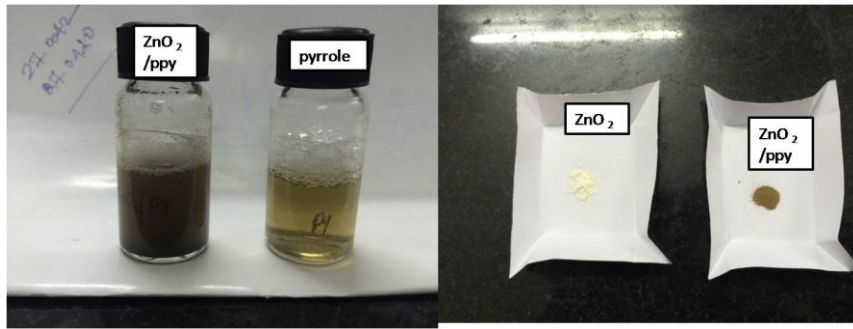

Figure S1: colour of ZnO<sub>2</sub>/ ppy composite aqueous suspension after reaction and colour of ZnO<sub>2</sub> and ZnO<sub>2</sub>/ ppy powder after centrifugation

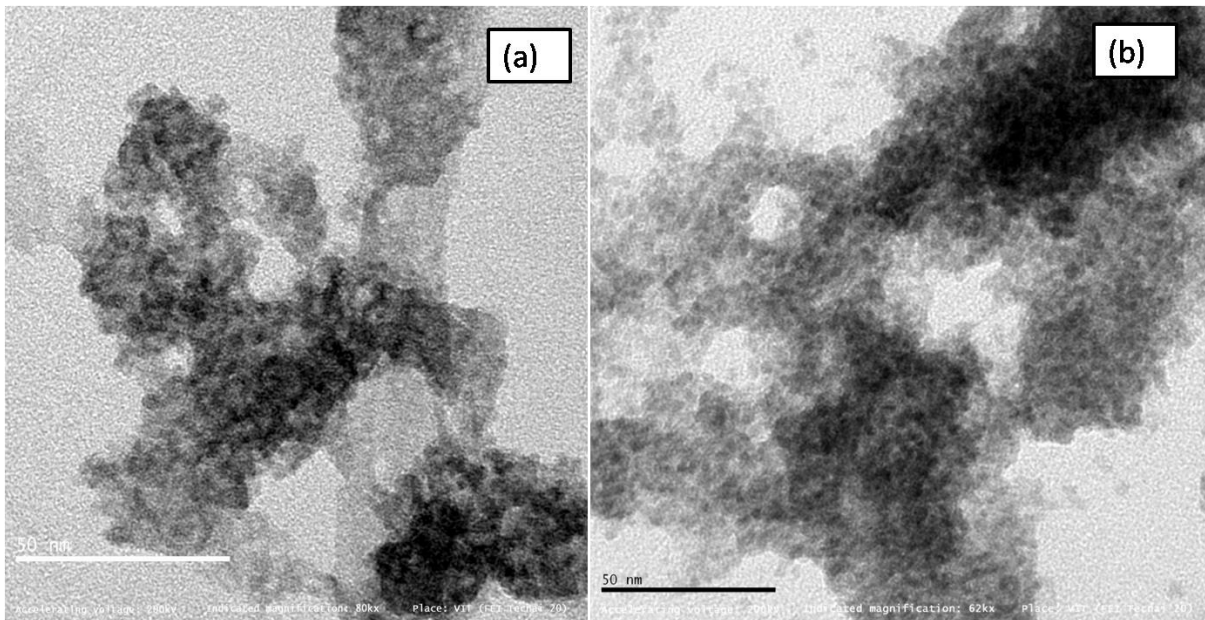

Figure S2: TEM of (a) ZnO<sub>2</sub> (b) ZnO<sub>2</sub>/ ppy

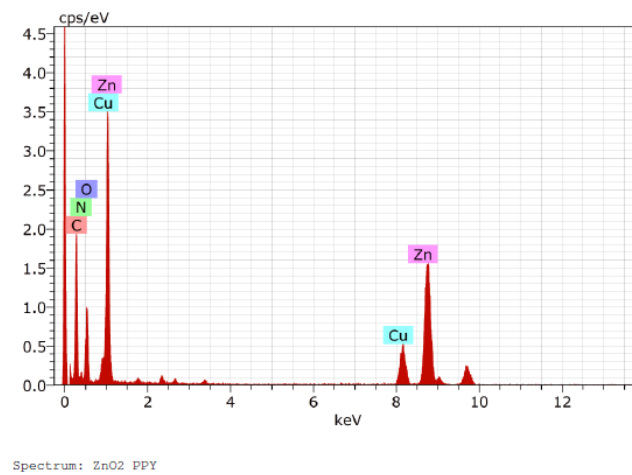

Figure S3: EDAX of ZnO<sub>2</sub> / ppy

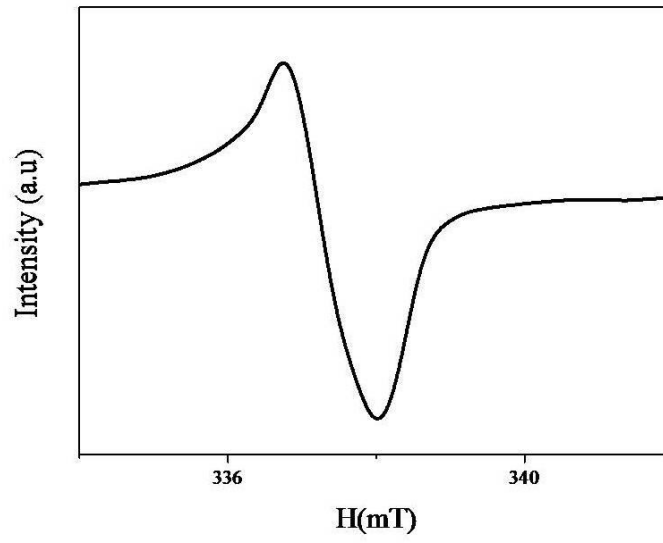

Figure S4: EPR of ZnO<sub>2</sub>

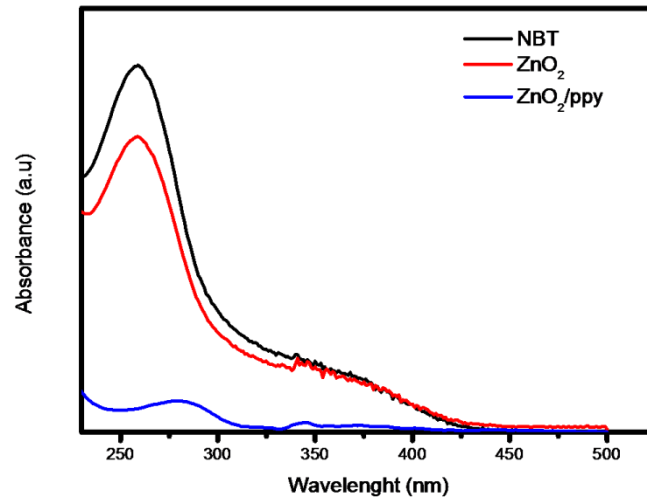

Figure S5: Degradation of NBT by ZnO<sub>2</sub> and ZnO<sub>2</sub> / ppy after 2h

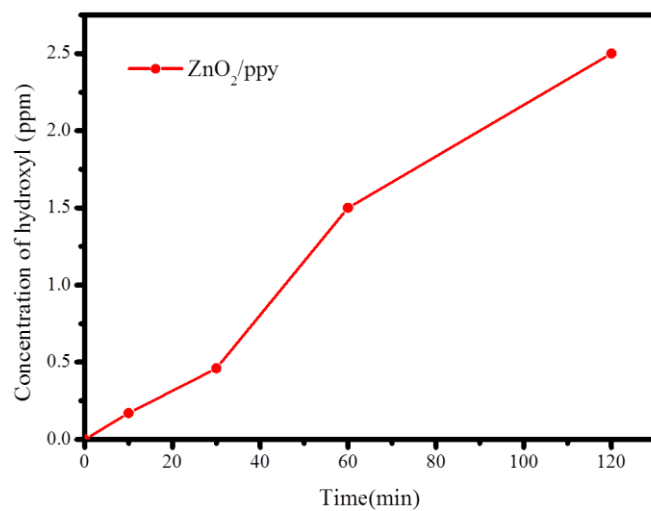

Figure S6: Kinetics of hydroxyl production in dark

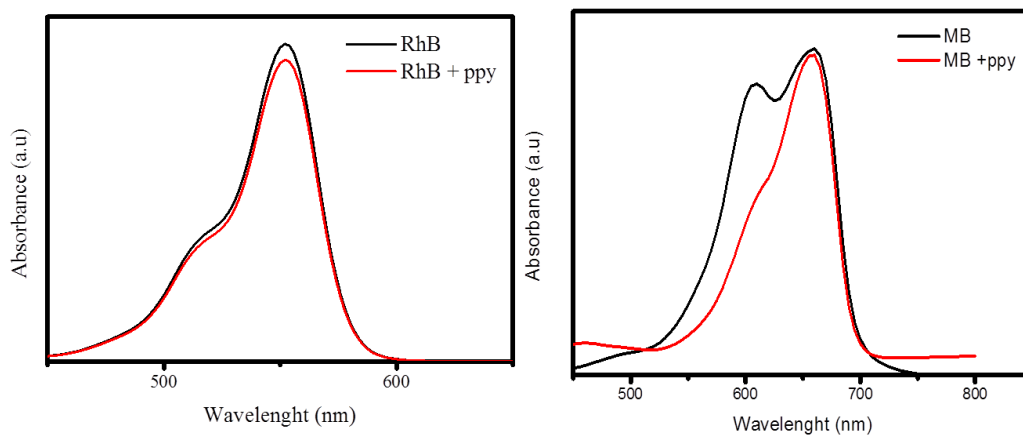

Figure S7: UV vis spectroscopy of RhB and MB in the presence of polypyrrole

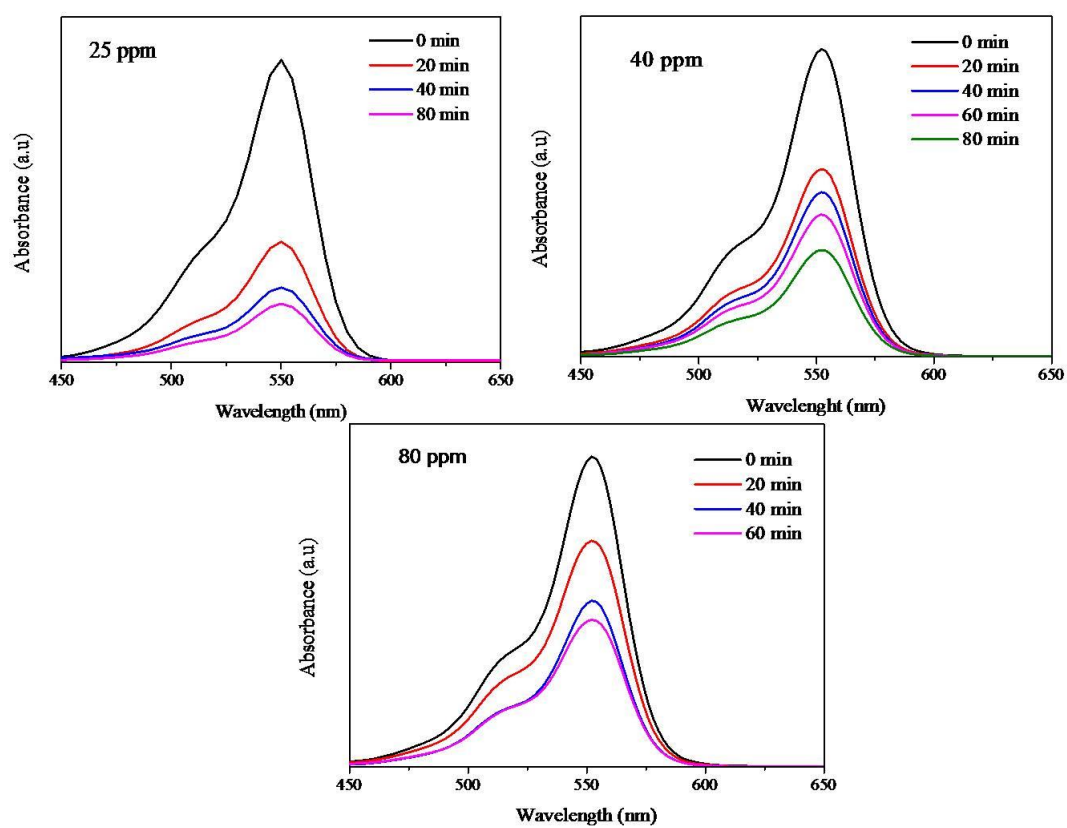

Figure S8: Degradation of RhB by  $\text{ZnO}_2/\text{ppy}$  at different concentration

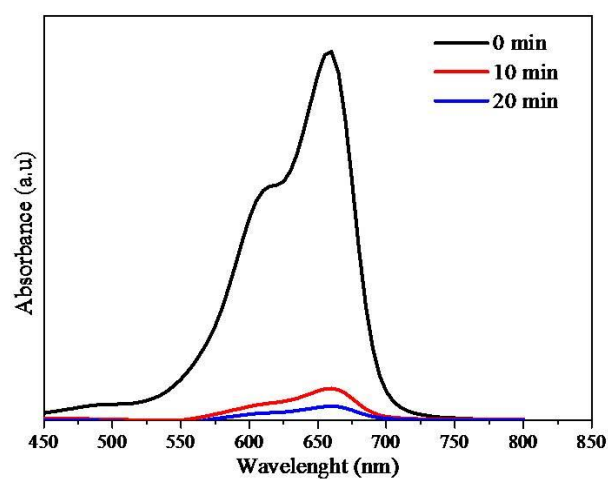

Figure S9: Degradation of MB (5 ppm) by  $\text{ZnO}_2/\text{ppy}$  under visible light

Table S1: kinetics of degradation of RhB with concentration of ZnO<sub>2</sub>/ ppy in dark

| Concentration of dye (ppm) | % of degradation | k(min <sup>-1</sup> )<br>X 10 <sup>-2</sup> |
|----------------------------|------------------|---------------------------------------------|
| 10                         | 100              | 35.6                                        |
| 25                         | 81               | 4.9                                         |
| 40                         | 65               | 2.8                                         |
| 80                         | 54               | 2.0                                         |

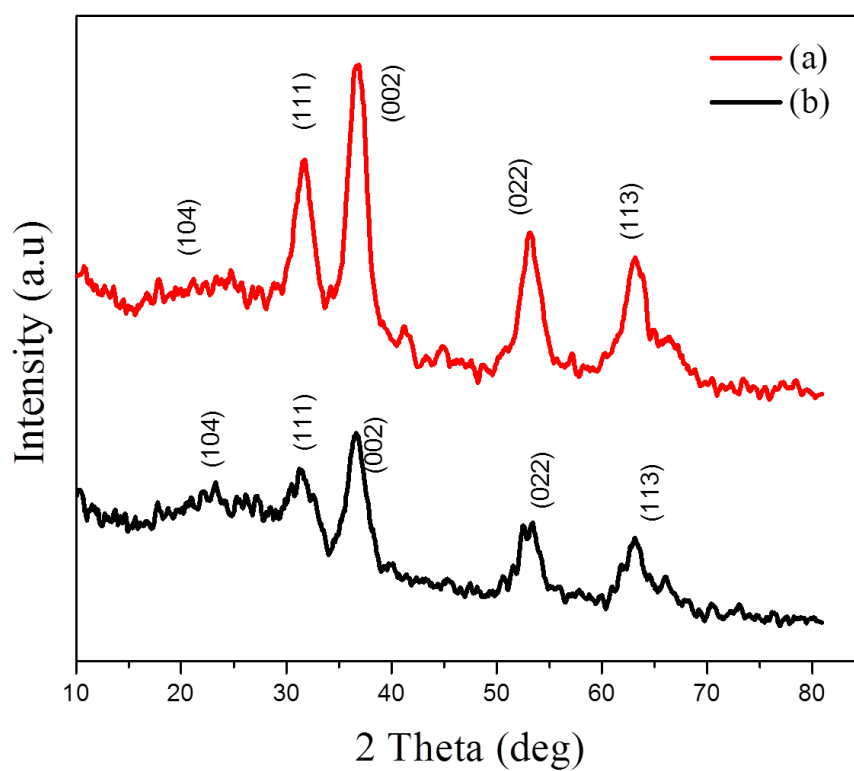

Fig. S10: XRD patterns of ZnO<sub>2</sub>/ ppy after dye degradation in (a) Dark (b) visible light

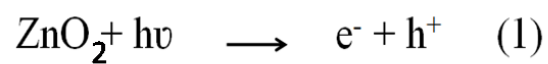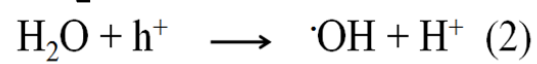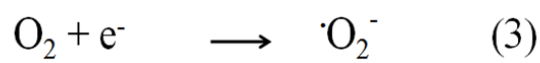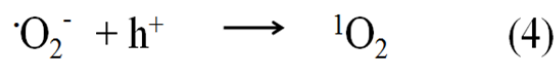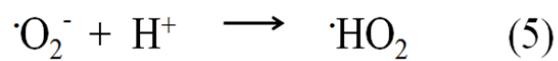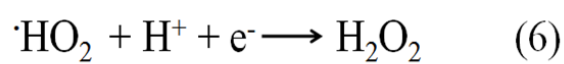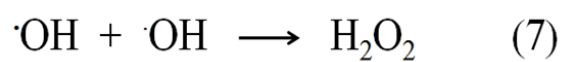

Scheme S1 : Mechanism of ROS generation under UV irradiation
